# Supplementary material
Source: Springer Nature journal article supplement (https://www.springermedizin.de/resource/supplementary/12936_2005_150_MOESM1_ESM.pdf/9546990)

**Day 0**

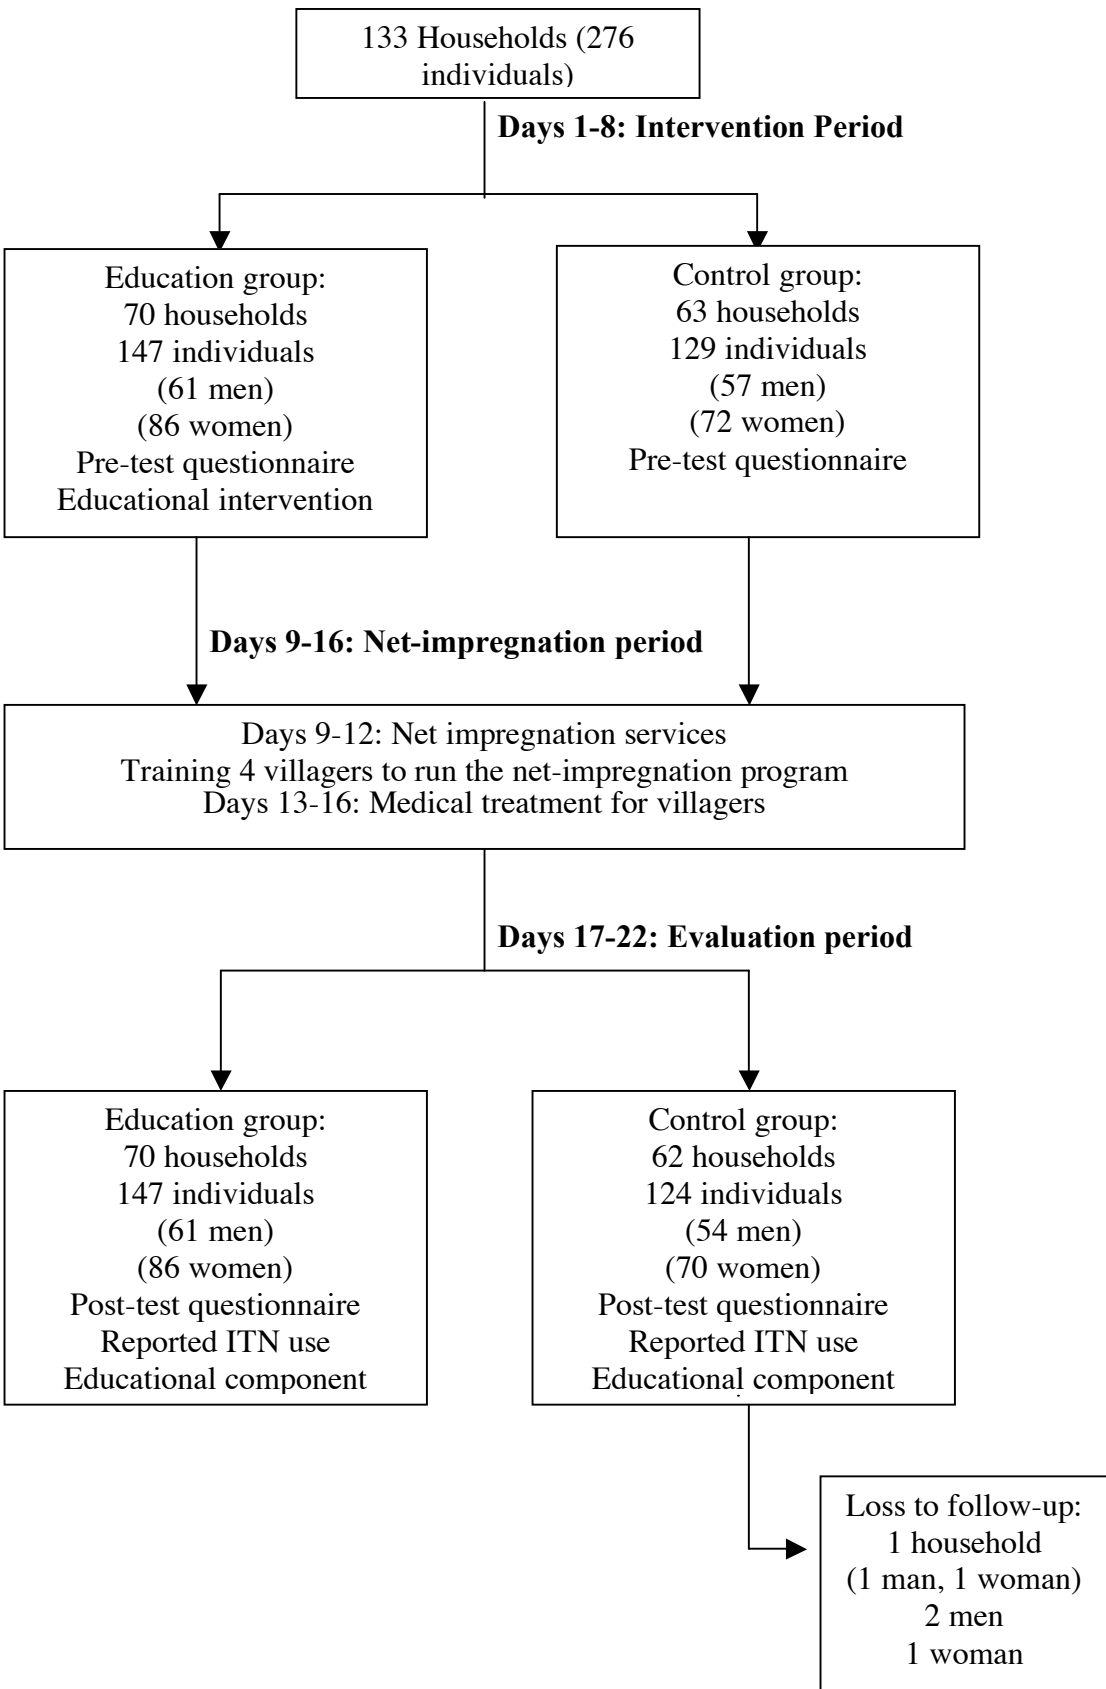

Supplement: MOESM1 [file 9546990]
